# Supplementary material for: Development and Validation of Machine Learning-Based Predictive Model for Prolonged Hospital Stay after Decompression Surgery for Lumbar Spinal Canal Stenosis
Source: PubMed Central journal article supplement — Spine Surg Relat Res. 2024 Feb 14;8(3):315–21. doi: 10.22603/ssrr.2023-0255 (PMC11165502; doi:10.22603/ssrr.2023-0255), 2024-02-14
Supplement: 2432-261X-8-0315-s001.pdf [file 2432-261X-8-0315-s001.pdf]

**Supplemental Table 1. Summary of patient cohort**

| <b>Variables</b>                      | <b>Patient cohort</b> |
|---------------------------------------|-----------------------|
| <b>Age (yrs)</b>                      | 71.1 ± 8.7            |
| <b>Sex</b>                            |                       |
| Female                                | 275 (32.4%)           |
| Male                                  | 573 (67.6%)           |
| <b>BMI (kg/m<sup>2</sup>)</b>         | 24.4 ± 3.6            |
| <b>Diagnosis</b>                      |                       |
| LSS                                   | 774 (91.3%)           |
| DS                                    | 74 (8.7%)             |
| <b>Duration of symptom</b>            |                       |
| < 2yrs                                | 441 (52.0%)           |
| ≥ 2yrs                                | 407 (48.0%)           |
| <b>Smoking habit</b>                  |                       |
| Smoking history                       | 297 (35.0%)           |
| Current smoker                        | 63 (7.4%)             |
| <b>Job type</b>                       |                       |
| Housewife                             | 237 (27.9%)           |
| Office work                           | 212 (25.0%)           |
| Manual labor                          | 124 (14.6%)           |
| Unemployed                            | 275 (32.4%)           |
| <b>History of spine surgery</b>       | 69 (8.1%)             |
| <b>Intervertebral level involved</b>  | 1.8 ± 0.8             |
| <b>Time of surgery (min.)</b>         | 69.4 ± 36.5           |
| <b>Estimated blood loss (mL)</b>      | 48.0 ± 112.7          |
| <b>Perioperative complication</b>     | 57 (6.7%)             |
| <b>Length of hospital stay (days)</b> | 12.1 ± 4.6            |
| <b>No. of comorbidities</b>           |                       |
| 0                                     | 161 (19.0%)           |
| 1                                     | 297 (35.0%)           |
| 2                                     | 193 (22.8%)           |
| ≥3                                    | 176 (23.2%)           |
| <b>Presence of comorbidities</b>      |                       |
| Cardiac disease                       | 144 (17.7%)           |

|                                                                                   |             |
|-----------------------------------------------------------------------------------|-------------|
| Cancer                                                                            | 112 (13.2%) |
| Cerebral disease                                                                  | 56 (6.6%)   |
| Diabetes mellitus                                                                 | 179 (20.0%) |
| Hypertension                                                                      | 446 (52.6%) |
| Kidney disease                                                                    | 23 (2.7%)   |
| Liver disease                                                                     | 29 (3.4%)   |
| Lung disease                                                                      | 50 (5.9%)   |
| Musculoskeletal disease                                                           | 137 (16.2%) |
| Parkinson disease                                                                 | 10 (1.2%)   |
| Renal disease                                                                     | 53 (6.3%)   |
| Rheumatoid arthritis                                                              | 32 (3.8%)   |
| Vascular disease                                                                  | 21 (2.5%)   |
| <b>Frailty (mFI-5)</b>                                                            |             |
| Robust                                                                            | 224 (26.4%) |
| Prefrail                                                                          | 345 (40.7%) |
| Frail                                                                             | 279 (32.9%) |
| <b>Means and standard deviations. Percentage in parenthesis. Range in bracket</b> |             |

**Supplemental Table 2. Comparisons of background variables among three different hospitals**

| Variables                  | Academic hospital                         | Tertiary center                         | Private institution                  | p1   | p2   | p3   |
|----------------------------|-------------------------------------------|-----------------------------------------|--------------------------------------|------|------|------|
| Age                        | 71.6±8.3                                  | 69.4±10.2                               | 71.0 ±8.6                            | ns   | ns   | ns   |
| Gender<br>(female)         | 165(31%)                                  | 46(36.5%)                               | 64(33.9%)                            |      |      |      |
| BMI (kg/m <sup>2</sup> )   | 24.8±3.6                                  | 23.7±3.4                                | 24.1±3.6                             | 0.01 | ns   | ns   |
| No. of<br>comorbidities    | 1.9±1.4                                   | 1.2±1.1                                 | 1.1±1                                | 0.01 | 0.01 | ns   |
| No. of reop<br>case        | 35(6.6%)                                  | 11(8.7%)                                | 23(12.2%)                            |      | ns   |      |
| Job status (H;<br>O; M; U) | 153(28.7%);157(29.5%);49(9.2%);174(32.6%) | 33(26.2%);44(34.9%);17(13.5%);32(25.4%) | 51(27%);11(5.8%);58(30.7%);69(36.5%) |      | 0.01 |      |
| Smoking (N;<br>H; A)       | 295(55.3%);217(40.7%);21(3.9%)            | 65(51.6%);47(37.3%);14(11.1%)           | 128(67.7%);33(17.5%);28(14.8%)       |      | 0.01 |      |
| TOS (min.)                 | 76.3±38.6                                 | 75.6±32.6                               | 46.0±19.5                            | ns   | 0.01 | 0.01 |
| EBL (mL)                   | 56.9±134.0                                | 57.3±54.3                               | 16.9±58.6                            | ns   | 0.01 | 0.01 |
| Level treated              | 1.8±0.8                                   | 1.7±0.9                                 | 1.9±0.7                              | ns   | ns   | ns   |
| Periop<br>complications    | 44(8.3%)                                  | 5(4%)                                   | 8(4.2%)                              |      | ns   |      |
| LOS (days)                 | 10.6±4.8                                  | 14.2±3.5                                | 14.9±2.2                             | 0.01 | 0.01 | ns   |

Means and standard deviations. Percentage in parenthesis. P1 indicated the comparisons between academic hospital and tertiary center. P2 indicated the comparisons between academic hospital and private institution. P3 indicated the comparisons between tertiary center and private institution. \* indicated statistically significant. Ns, not significant; H, housewife; O, office work; M, manual labor; U, unemployed; N, no smoking; H, smoking history; A, active smoker
